# Supplementary material for: Calcium-dependent protein kinases responsible for the phosphorylation of a bZIP transcription factor FD crucial for the florigen complex formation
Source: PubMed Central journal article supplement (PMC4321167; doi:10.1038/srep08341), 2015-02-09
Supplement: srep08341-s1.pdf [file srep08341-s1.pdf]

## Supplementary Information

Title: Calcium-dependent protein kinases responsible for the phosphorylation of a bZIP transcription factor FD crucial for the florigen complex formation

Author: Nozomi Kawamoto<sup>1</sup>, Michiko Sasabe<sup>2,3</sup>, Motomu Endo<sup>1</sup>, Yasunori Machida<sup>2</sup>, and Takashi Araki<sup>1</sup>

<sup>1</sup>Division of Integrated Life Science, Graduate School of Biostudies, Kyoto University, Yoshida-Konoe-cho, Sakyo-ku, Kyoto, 606-8501, Japan

<sup>2</sup>Division of Biological Science, Graduate School of Science, Nagoya University, Furo-cho, Chikusa-ku, Nagoya, 464-8602, Japan

<sup>3</sup>Present address: Department of Biology, Faculty of Agriculture and Life Science, Hirosaki University, Hirosaki 036-8561, Japan

Contact address

Corresponding author: Takashi Araki (taraqui@lif.kyoto-u.ac.jp)

## Materials and Methods

### Plasmid construction

All the plasmid constructs were generated using standard molecular biology methods.

Lists of plasmids and primers used in the construction are presented in Table S1 and Table S2.

FD-His: FD was cloned into *Nde* I/*Sal* I sites of pET41a.

GST-oligo FDs: Single-strand oligo DNA fragments (corresponding to M265-F285 of FD) were hybridized and ligated into *Spe* I/*Xho* I sites of pET41a.

GST-tFDs: Wild-type and T282A versions of tFD (V196-F285) were cloned into *Spe* I/*Sal* I sites of pET41a.

GST-FD: FD ORF was cloned into *Bam*H I/*Sal* I sites of pGEX6P-1.

GST-FDP: FDP ORF was cloned into *Bam*H I/*Sal* I sites of pGEX6P-1.

FD:mCherry: mCherry ORF was cloned into the *Sac* II site of pPZP211/35S to generate pPZP211/35S::mCherry. Then, FD ORF was cloned into *Bam*H I and *Sma* I sites of pPZP211/35S::mCherry to generate the FD:mCherry translational fusion construct.

CPK-CA: ORF of each CPK gene without the C-terminal auto-inhibition region and

EF-hand motifs was amplified by PCR and cloned into pET32a by the In-Fusion cloning system (Clontech). For CPK4, CPK6, and CPK33, full-length ORF was also cloned by the In-Fusion cloning system.

CDPK library (full length): Each CPK gene was amplified by PCR and cloned into pPZP211/35S::EYFP:3HA:His vector by the In-Fusion cloning system. This vector was generated by the following procedure. 3HA:His-coding single-strand DNA fragments were hybridized and ligated into the *Sac* II site of pPZP211/35S to generate pPZP211/35S::3HA:His. EYFP was cloned by the In-Fusion cloning system into *Sac* I/*Sac* II sites of pPZP211/35S::3HA:His.

Yeast two-hybrid constructs: Wild-type and mutant versions of FD, FT, and 14-3-3s were cloned into pCUY<sup>54</sup> and pGAD424, respectively into the following restriction enzyme sites: FD (*Bam*H I/*Sal* I); mutant FDs (*Sma* I/*Sal* I); FT (*Sma* I/*Sal* I); GRF3 (14-3-3 Psi) (*Bam*H I/*Pst* I); and GRF4 (14-3-3 Phi) (*Sma* I/*Bam*H I).

BiFC constructs: YN-T282E was ligated into *Xba* I/*Sac* I sites of pBI121.

Plant transformation constructs: the 35S promoter of pPZP211/35S::CPK6:EYFP:3HA:His and pPZP211/35S::CPK33:EYFP:3HA:His was

replaced by the promoters of *CPK6* and *CPK33*, respectively, by the In-Fusion cloning system with *Hind* III and *Xba* I sites. The genomic fragments 3,001-bp and 3,599-bp upstream of the start ATG codon were used as promoter regions of *CPK6* and *CPK33*, respectively.

*fd-1* complementation test: Wild-type and mutant versions of FD were cloned into *Bam*H I/*Sac* II sites of pENTR1A and LR reaction to pFAST-G02.

#### *Arabidopsis* transformation

The constructs in binary vectors were introduced into *Agrobacterium tumefaciens* strain GV3101::pMP90 and transformed into *Arabidopsis* by the floral dip procedure. For the *fd-1* complementation test, constructs with the FAST marker were introduced into *fd-1* and Col, and T1 seeds harboring the expression cassettes were selected from T1 seed pool by GFP fluorescence<sup>55</sup>. Selected T1 seeds were sterilized, sown on soil and grown under LD condition. Similarly selected Col and *fd-1* T1 plants harboring the empty vector were used as the control.



## Transformation of *Nicotiana benthamiana* leaves

*Agrobacterium tumefaciens* strain GV3101::pMP90 harboring expression plasmids was grown in LB medium supplemented with appropriate antibiotics, harvested by centrifugation at 5,000 rpm for 10 min, and resuspended in 10 mM MgCl<sub>2</sub> and 150 μM acetosyringone. The cultures were incubated at room temperature for 2 h and infiltrated into *N. benthamiana* leaves using a 1-ml syringe. The leaf samples were harvested 2 days after infiltration for observation by confocal microscopy.

## Yeast two-hybrid assay

The Matchmaker GAL4 Two-Hybrid System 3 (Clontech) was used. Protein coding regions of wild-type and mutant versions of FD, FT, and 14-3-3 were cloned into pCUY<sup>54</sup> or pGAD424. Yeast two-hybrid assays were performed using yeast strain AH109. The appropriate plasmids were transformed into the yeast strain by the lithium acetate method and were selected on SCD plates lacking leucine and tryptophan (–LW). After overnight culture of transformed yeasts on liquid YPD, yeast cells were harvested, washed, and transferred to the selection plates containing SCD lacking leucine,

tryptophan, and histidine (-LWH) for the histidine requirement test. These plates were incubated at 30°C and scored for yeast cell growth.

Bimolecular fluorescent complementation (BiFC) analysis and confocal microscopy,

BiFC analysis was performed as previously described<sup>5</sup>.  $35S::YFP^C::FT$  (YC-FT), wild-type and mutant versions of  $35S::YFP^N::FD$  (YN-FD, YN-T282A, and YN-T282E),  $35S::YFP^N$  (YN) and  $35S::YFP^C$  (YC) were introduced into *N. benthamiana* epidermal cells in the indicated combinations. Fluorescence was observed with a confocal laser scanning microscope (Olympus FV1000).

Co-localization analysis

$35S::CPK33::EYFP::3HA::His$  and  $35S::FD::mCherry$  constructs were co-introduced into epidermal cells of *N. benthamiana* leaf by *Agrobacterium*-mediated transient transformation. Leaf samples were harvested 2 days after infiltration for observation by confocal microscopy. Fluorescence was detected with a FV1000 confocal laser scanning microscope (Olympus) and signal intensity was analyzed by

ASW-10 software (Olympus).

#### RT-PCR analysis

RNA was extracted using Sepazol reagent (Nacalai tesque) and treated with RNase-free DNase (TaKaRa) according to the manufacture's instructions. Total RNA (1  $\mu$ g) was reverse-transcribed in a 20  $\mu$ l reaction mixture using Transcriptor (Roche).

After the reaction, the mixture was diluted with 80  $\mu$ l of TE buffer, and 1  $\mu$ l aliquots were used for PCR in 20  $\mu$ l of PCR mixture containing 2  $\mu$ l of 10X Ex Taq buffer, 2  $\mu$ l of 2 mM dNTPs, 2  $\mu$ l of 10  $\mu$ M each of primers, and 0.1  $\mu$ l of Taq DNA polymerase.

PCRs were performed with the following programs.

FD: 96°C 30sec, 55°C 30sec, 72°C 30sec; 35 cycles

LFY: 96°C 30sec, 55°C 30sec, 72°C 30sec; 35 cycles

AP1: 96°C 30sec, 60°C 30 sec, 72°C 30sec; 35 cycles

ACT2: 96°C 30sec, 55°C 30sec, 72°C 30sec; 25 cycles

CPK4 5' part: 96°C 30sec, 60°C 30 sec, 72°C 30sec; 30 cycles

CPK4 3' part: 96°C 30sec, 55°C 30 sec, 72°C 30sec; 30 cycles

CPK6 5' part: 96°C 30sec, 55°C 30sec, 72°C 30sec; 30 cycles

CPK6 3' part: 96°C 30sec, 58°C 30sec, 72°C 30sec; 30 cycles

CPK33 5' part: 96°C 30sec, 55°C 30sec, 72°C 30sec; 30 cycles

CPK33 3' part: 96°C 30sec, 55°C 30sec, 72°C 30sec; 30 cycles.

For amplification of the entire coding region of CPK genes, 1 µl aliquots of cDNA were used for PCR in 20 µl of PCR mixture containing 10 µl of 2X KOD FX Neo, 2 µl of 2 mM dNTPs, 2 µl of 10 µM each primers, 5% dimethyl sulfoxide, and 0.5 µl of KOD FX Neo DNA polymerase (TOYOBO). Touchdown PCR method was employed. During first cycles, annealing temperature is decreased in 0.5°C per cycle. Detail PCR program was described as follows.

For first half cycles: 96°C 30sec, 65 to 50°C 30sec, 68°C 2min; 30 cycles

For second half cycles: 96°C 30sec, 50°C 30sec, 68°C 2min; 30 cycles

Primers are listed in Table S2.

Quantitative RT-PCR analysis

Plants were grown under LD condition and harvested to collect shoot apices

after 7 days at ZT15. RNA was extracted and cDNA was synthesized as described in RT-PCR analysis. Quantitative RT-PCR analyses were performed with a CFX96 system (Bio-Rad laboratories). Two- $\mu$ l aliquots were used for PCR in a 20  $\mu$ l reaction mixture containing 2  $\mu$ l of 10X Ex Taq buffer, 2.4  $\mu$ l of 2 mM dNTPs, 0.5  $\mu$ l of 10  $\mu$ M each primers, 0.8  $\mu$ l of 50 mM MgSO<sub>4</sub>, 10X SYBR mix, and 0.2  $\mu$ l of Taq DNA polymerase.

Reactions were performed with the following programs.

CPK6: 95°C 10sec, 65°C 15sec, 72°C 15sec; 40 cycles

CPK33: 95°C 10sec, 60°C 15sec, 72°C 15sec; 40 cycles

FLC: 95°C 10sec, 68°C 15sec, 72°C 15sec; 40 cycles

TUB: 95°C 10sec, 60°C 15sec, 72°C 15sec; 40 cycles

Primers are listed in Table S2.

Spatial expression analysis at shoot apex

To detect EGFP and EYFP fluorescence at the shoot apex, 7-day-old transgenic plants of *pCPK6::CPK6:EYFP:3HA:His*, *pCPK33::CPK33:EYFP:3HA:His*, and *pFD::EGFP:FD; fd-1* were embedded in 5 % agar and sectioned by a vibratome.

Sections were stained with DAPI solution (1 µg/ml DAPI, 0.1 % Triton X-100 in PBS) and were observed with a confocal laser scanning microscope (Olympus FV1000). More than five independent T1 plants were examined for CPK6 and CPK33.

## References

54. Suzuki, T., Sakurai, K., Ueguchi, C. & Mizuno, T. Two types of putative nuclear factors that physically interact with histidine-containing phosphotransfer (Hpt) domains, signaling mediators in His-to-Asp phosphorelay, in Arabidopsis. *Plant Cell Physiol.* **42**, 37-45 (2001).
55. Shimada, T.L., Shimada, T. & Hara-Nishimura, I. A rapid non-destructive screenable marker, FAST, for identifying transformed seeds of *Arabidopsis thaliana*. *Plant J.* **61**, 519-528 (2010).

Table S1. List of plasmid constructs used in this study.

|                    | Construct                   | Insert fragment    | Template            | Primer Fw | Primer Rv | Vector   | Cloning methods |
|--------------------|-----------------------------|--------------------|---------------------|-----------|-----------|----------|-----------------|
| Protein expression | FD-His                      | FD CDS             | FD cDNA             | 684       | 3043      | pET41a   | Nde I/Sal I     |
|                    | GST-oligoFD-His             | oligo FD           | ssDNA hybridization | 3401      | 3402      | pET41a   | Spe I/Xho I     |
|                    | GST-T276A oligo-His         | oligo T276A        | ssDNA hybridization | 3403      | 3404      | pET41a   | Spe I/Xho I     |
|                    | GST-T282A oligo-His         | oligo T282A        | ssDNA hybridization | 3405      | 3406      | pET41a   | Spe I/Xho I     |
|                    | GST-T276A, T282A oligo –His | oligo T276A, T282A | ssDNA hybridization | 3407      | 3408      | pET41a   | Spe I/Xho I     |
|                    | GST-L277Q oligo His         | oligo L277Q        | ssDNA hybridization | 4214      | 4215      | pET41a   | Spe I/Xho I     |
|                    | GST-tFD                     | truncated FD       | FD cDNA             | 2400      | 2393      | pET41a   | Spe I/Sal I     |
|                    | GST-tT282A                  | truncated T282A    | FD cDNA             | 2400      | 2395      | pET41a   | Spe I/Sal I     |
|                    | GST-FD                      | FD CDS             | FD cDNA             | 700       | 2393      | pGEX6P-1 | BamH I/Sal I    |
|                    | GST-FDP                     | FDP CDS            | FDP cDNA            | 1327      | 2393      | pGEX6P-1 | BamH I/Sal I    |

|                  |                  |              |               |      |      |         |              |
|------------------|------------------|--------------|---------------|------|------|---------|--------------|
|                  | Trx-His-CPK3-CA  | CPK3-CA      | CPK3 cDNA     | 5207 | 5814 | pET32a  | In-Fusion    |
|                  | Trx-His-CPK4-CA  | CPK4-CA      | CPK4 cDNA     | 5209 | 5815 | pET32a  | In-Fusion    |
|                  | Trx-His-CPK5-CA  | CPK5-CA      | CPK5 cDNA     | 5211 | 5816 | pET32a  | In-Fusion    |
|                  | Trx-His-CPK6-CA  | CPK6-CA      | CPK6 cDNA     | 5213 | 5817 | pET32a  | In-Fusion    |
|                  | Trx-His-CPK11-CA | CPK11-CA     | CPK11 cDNA    | 5223 | 5818 | pET32a  | In-Fusion    |
|                  | Trx-His-CPK12-CA | CPK12-CA     | CPK12 cDNA    | 5225 | 5819 | pET32a  | In-Fusion    |
|                  | Trx-His-CPK26-CA | CPK26-CA     | CPK26 cDNA    | 5253 | 5820 | pET32a  | In-Fusion    |
|                  | Trx-His-CPK27-CA | CPK27-CA     | CPK27 cDNA    | 5255 | 5821 | pET32a  | In-Fusion    |
|                  | Trx-His-CPK32-CA | CPK32-CA     | CPK32 cDNA    | 5265 | 5822 | pET32a  | In-Fusion    |
|                  | Trx-His-CPK33-CA | CPK33-CA     | CPK33 cDNA    | 5267 | 5823 | pET32a  | In-Fusion    |
|                  | Trx-His-CPK4     | CPK4 CDS     | CPK4 cDNA     | 5209 | 6156 | pET32a  | In-Fusion    |
|                  | Trx-His-CPK6     | CPK6 CDS     | CPK6 cDNA     | 5213 | 6157 | pET32a  | In-Fusion    |
|                  | Trx-His-CPK33    | CPK33 CDS    | CPK33 cDNA    | 5267 | 6158 | pET32a  | In-Fusion    |
| Yeast two hybrid | AD-FD            | FD CDS       | FD cDNA       | 678  | 689  | pGAD424 | BamH I/Sal I |
|                  | AD-T282A         | T282A CDS    | FD cDNA       | 690  | 2245 | pGAD424 | Sma I/Sal I  |
|                  | AD-T282E         | T282E CDS    | FD cDNA       | 690  | 2246 | pGAD424 | Sma I/Sal I  |
|                  | AD-L277Q         | L277Q CDS    | FD cDNA       | 690  | 4295 | pGAD424 | Sma I/Sal I  |
|                  | AD-LQTE          | LQTE CDS     | L277Q CDS     | 690  | 4296 | pGAD424 | Sma I/Sal I  |
|                  | BD-FT            | FT CDS       | FT cDNA       | 3371 | 3372 | pCUY    | Sma I/Sal I  |
|                  | BD-GRF3 Psi      | GRF3 Psi CDS | GRF3 Psi cDNA | 4263 | 4264 | pCUY    | BamH I/Pst I |



|                         |                        |              |               |      |                           |                           |               |
|-------------------------|------------------------|--------------|---------------|------|---------------------------|---------------------------|---------------|
|                         | BD-GRF4 Phi            | GRF4 Phi CDS | GRF4 Phi cDNA | 4265 | 4011                      | pCUY                      | Sma I/BamH I  |
| Plant transformation    | 35S::YN-T282E          | YN-T282E     | YN-FD         | 1483 | T282E                     | pBI121                    | XbaI/Sac I    |
|                         | 35S::FD                | FD CDS       | FD cDNA       | 700  | 695                       | pENTR1A/pFAST-G02         | Gateway       |
|                         | 35S::T282A             | T282A CDS    | FD cDNA       | 700  | 4207                      | pENTR1A/pFAST-G02         | Gateway       |
|                         | 35S::T282E             | T282E CDS    | FD cDNA       | 700  | 4206                      | pENTR1A/pFAST-G02         | Gateway       |
|                         | 35S::L277Q             | L277Q CDS    | FD cDNA       | 700  | 695                       | pENTR1A/pFAST-G02         | Gateway       |
|                         | 35S::LQTE              | LQTE CDS     | L277Q CDS     | 700  | 4206                      | pENTR1A/pFAST-G02         | Gateway       |
|                         | 35S::EYFP-FD           | FD CDS       | FD cDNA       | 700  | 695                       | pPZP211/35S::EYFP         | BamH I/Sac II |
|                         | 35S::EYFP-T282A        | T282A CDS    | FD cDNA       | 700  | 4207                      | pPZP211/35S::EYFP         | BamH I/Sac II |
|                         | 35S::EYFP-T282E        | T282E CDS    | FD cDNA       | 700  | 4206                      | pPZP211/35S::EYFP         | BamH I/Sac II |
|                         | 35S::FD-mCherry        | FD CDS       | FD cDNA       | 700  | 1475                      | pPZP211/35S::mCherry      | BamH I/Sma I  |
|                         | 35S::CPK1:EYFP:3HA:His | CPK1 CDS     | CPK1 cDNA     | 5203 | 5204                      | pPZP211/35S::EYFP:3HA:His | In-Fusion     |
|                         | 35S::CPK3:EYFP:3HA:His | CPK3 CDS     | CPK3 cDNA     | 5207 | 5208                      | pPZP211/35S::EYFP:3HA:His | In-Fusion     |
|                         | 35S::CPK4:EYFP:3HA:His | CPK4 CDS     | CPK4 cDNA     | 5209 | 5210                      | pPZP211/35S::EYFP:3HA:His | In-Fusion     |
|                         | 35S::CPK5:EYFP:3HA:His | CPK5 CDS     | CPK5 cDNA     | 5211 | 5212                      | pPZP211/35S::EYFP:3HA:His | In-Fusion     |
|                         | 35S::CPK6:EYFP:3HA:His | CPK6 CDS     | CPK6 cDNA     | 5213 | 5214                      | pPZP211/35S::EYFP:3HA:His | In-Fusion     |
|                         | 35S::CPK7:EYFP:3HA:His | CPK7 CDS     | CPK7 cDNA     | 5215 | 5216                      | pPZP211/35S::EYFP:3HA:His | In-Fusion     |
|                         | 35S::CPK8:EYFP:3HA:His | CPK8 CDS     | CPK8 cDNA     | 5217 | 5218                      | pPZP211/35S::EYFP:3HA:His | In-Fusion     |
|                         | 35S::CPK9:EYFP:3HA:His | CPK9 CDS     | CPK9 cDNA     | 5219 | 5220                      | pPZP211/35S::EYFP:3HA:His | In-Fusion     |
| 35S::CPK10:EYFP:3HA:His | CPK10 CDS              | CPK10 cDNA   | 5221          | 5222 | pPZP211/35S::EYFP:3HA:His | In-Fusion                 |               |

|                            |                   |             |      |      |                                 |           |
|----------------------------|-------------------|-------------|------|------|---------------------------------|-----------|
| 35S::CPK11:EYFP:3HA:His    | CPK11 CDS         | CPK11 cDNA  | 5223 | 5224 | pPZP211/35S::EYFP:3HA:His       | In-Fusion |
| 35S::CPK12:EYFP:3HA:His    | CPK11 CDS         | CPK12 cDNA  | 5225 | 5226 | pPZP211/35S::EYFP:3HA:His       | In-Fusion |
| 35S::CPK13:EYFP:3HA:His    | CPK11 CDS         | CPK13 cDNA  | 5227 | 5228 | pPZP211/35S::EYFP:3HA:His       | In-Fusion |
| 35S::CPK15:EYFP:3HA:His    | CPK11 CDS         | CPK15 cDNA  | 5231 | 5232 | pPZP211/35S::EYFP:3HA:His       | In-Fusion |
| 35S::CPK21:EYFP:3HA:His    | CPK21 CDS         | CPK21 cDNA  | 5223 | 5224 | pPZP211/35S::EYFP:3HA:His       | In-Fusion |
| 35S::CPK23:EYFP:3HA:His    | CPK23 CDS         | CPK23 cDNA  | 5245 | 5246 | pPZP211/35S::EYFP:3HA:His       | In-Fusion |
| 35S::CPK26:EYFP:3HA:His    | CPK26 CDS         | CPK26 cDNA  | 5253 | 5254 | pPZP211/35S::EYFP:3HA:His       | In-Fusion |
| 35S::CPK27:EYFP:3HA:His    | CPK27 CDS         | CPK27 cDNA  | 5255 | 5256 | pPZP211/35S::EYFP:3HA:His       | In-Fusion |
| 35S::CPK28:EYFP:3HA:His    | CPK28 CDS         | CPK28 cDNA  | 5257 | 5258 | pPZP211/35S::EYFP:3HA:His       | In-Fusion |
| 35S::CPK30:EYFP:3HA:His    | CPK30 CDS         | CPK30 cDNA  | 5261 | 5262 | pPZP211/35S::EYFP:3HA:His       | In-Fusion |
| 35S::CPK31:EYFP:3HA:His    | CPK31 CDS         | CPK31 cDNA  | 5263 | 5264 | pPZP211/35S::EYFP:3HA:His       | In-Fusion |
| 35S::CPK32:EYFP:3HA:His    | CPK32 CDS         | CPK32 cDNA  | 5265 | 5266 | pPZP211/35S::EYFP:3HA:His       | In-Fusion |
| 35S::CPK33:EYFP:3HA:His    | CPK33 CDS         | CPK33 cDNA  | 5267 | 5268 | pPZP211/35S::EYFP:3HA:His       | In-Fusion |
| pCPK6::CPK6:EYFP:3HA:His   | Promoter CPK6     | Genomic DNA | 6324 | 6325 | pPZP211/35S::CPK6:EYFP:3HA:His  | In-Fusion |
| pCPK33::CPK33:EYFP:3HA:His | Promoter<br>CPK33 | Genomic DNA | 6322 | 6323 | pPZP211/35S::CPK33:EYFP:3HA:His | In-Fusion |

Table S2. List of primers used in this study.

| Purpose            | DNA fragments      | Name | Sequence                                                                 |
|--------------------|--------------------|------|--------------------------------------------------------------------------|
| Protein expression | oligo FD           | 3401 | ctagtATGGCTGCAGCAATTCAGCAACCCAAAAAGAACACACTTCAACGGTCTTCCACAGCTCCATTTTC   |
|                    |                    | 3402 | tcgagAAATGGAGCTGTGGAAGACCGTTGAAGTGTGTTCTTTTTGGGTTGCTGAATTGCTGCAGCCATA    |
|                    | oligo T276A        | 3403 | ctagtATGGCTGCAGCAATTCAGCAACCCAAAAAGAACGCACACTTCAACGGTCTTCCACAGCTCCATTTTC |
|                    |                    | 3404 | tcgagAAATGGAGCTGTGGAAGACCGTTGAAGTGC GTTCTTTTTGGGTTGCTGAATTGCTGCAGCCATA   |
|                    | oligo T282A        | 3405 | ctagtATGGCTGCAGCAATTCAGCAACCCAAAAAGAACACACTTCAACGGTCTTCCGCAGCTCCATTTTC   |
|                    |                    | 3406 | tcgagAAATGGAGCTGCGGAAGACCGTTGAAGTGTGTTCTTTTTGGGTTGCTGAATTGCTGCAGCCATA    |
|                    | oligo T276A, T282A | 3407 | ctagtATGGCTGCAGCAATTCAGCAACCCAAAAAGAACGCACACTTCAACGGTCTTCCGCAGCTCCATTTTC |
|                    |                    | 3408 | tcgagAAATGGAGCTGCGGAAGACCGTTGAAGTGC GTTCTTTTTGGGTTGCTGAATTGCTGCAGCCATA   |
|                    | oligo L277Q        | 4215 | ctagtATGGCTGCAGCAATTCAGCAACCCAAAAAGAACACACAACAACGGTCTTCCACAGCTCCATTTTC   |
|                    |                    | 4216 | tcgagAAATGGAGCTGTGGAAGACCGTTGTTGTGTTCTTTTTGGGTTGCTGAATTGCTGCAGCCATA      |
|                    | tFD                | 2400 | actagtGTTCCATCCAGTTCTTTTGG                                               |
|                    |                    | 2393 | gtcgacTCAAAATGGAGCTGTGGAAGACC                                            |
|                    | tT282A             | 2400 | actagtGTTCCATCCAGTTCTTTTGG                                               |
|                    |                    | 2395 | gtcgacTCAAAATGGAGCTGCGGAAGACC                                            |
|                    | FD (pET41a)        | 684  | catatgATGTTGTCATCAGCTAAGCATCAGA                                          |
|                    |                    | 3043 | gtcgacAAATGGAGCTGTGGAAGACCGTT                                            |
|                    | FD (pGEX)          | 700  | ggatccATGTTGTCATCAGCTAAGCAT                                              |

|            |  |      |                                       |
|------------|--|------|---------------------------------------|
|            |  | 2393 | gtcgacTCAAAATGGAGCTGTGGAAGACC         |
| FDP (pGEX) |  | 1327 | aaccgggggatccATGTTGTCATCAGCAAAGCA     |
|            |  | 2393 | gtcgacTCAAAATGGAGCTGTGGAAGACC         |
| CPK3-CA    |  | 5207 | GGCTGATATCGGATCCATGGGCCACAGACACAGC    |
|            |  | 5814 | CCGCAAGCTTGTGATTACTCCCATCTTCTCTAA     |
| CPK4-CA    |  | 5209 | GGCTGATATCGGATCCATGGAGAAACCAACCCTAG   |
|            |  | 5815 | CCGCAAGCTTGTGATTAAGCATGTTTCATCAACAATC |
| CPK5-CA    |  | 5211 | GGCTGATATCGGATCCATGGGCAATTCTTGCCGTG   |
|            |  | 5816 | CCGCAAGCTTGTGATTAACACCATTCTCACAGAT    |
| CPK6-CA    |  | 5213 | GGCTGATATCGGATCCATGGGCAATTCATGTCGTG   |
|            |  | 5817 | CCGCAAGCTTGTGATTAAACTCCATTCTCACAGAT   |
| CPK11-CA   |  | 5223 | GGCTGATATCGGATCCATGGAGACGAAGCCAAACC   |
|            |  | 5818 | CCGCAAGCTTGTGATTATGCTTGTTTCATCGACAAT  |
| CPK12-CA   |  | 5225 | GGCTGATATCGGATCCATGGCGAACAAACCAAGAAC  |
|            |  | 5819 | CCGCAAGCTTGTGATTAACCTTATCATCCACAATC   |
| CPK26-CA   |  | 5253 | GGCTGATATCGGATCCATGCATAGAGATCTAAAGCC  |
|            |  | 5820 | CCGCAAGCTTGTGATTAACCTCCATTTTCACAGATC  |
| CPK27-CA   |  | 5255 | GGCTGATATCGGATCCATGGGTTGCTTCAGCAGTA   |
|            |  | 5821 | CCGCAAGCTTGTGATTATTCTCCTTCTTTCATCCA   |
| CPK32-CA   |  | 5265 | GGCTGATATCGGATCCATGGGTAATTGTTGCGGAAC  |

|                  |          |      |                                              |
|------------------|----------|------|----------------------------------------------|
|                  |          | 5822 | CCGCAAGCTTGTGCGATTATGTCTTTGCATTCTGTAAC       |
|                  | CPK33-CA | 5267 | GGCTGATATCGGATCCATGGGGAATTGCTTAGCCA          |
|                  |          | 5823 | CCGCAAGCTTGTGCGATTATTCTCCACCTTCTCTTAG        |
|                  | CPK4     | 5209 | GGCTGATATCGGATCCATGGAGAAACCAAACCCTAG         |
|                  |          | 6156 | CCGCAAGCTTGTGCGATTACTTTGGTGAATCATCAGA        |
|                  | CPK6     | 5213 | GGCTGATATCGGATCCATGGGCAATTCATGTCGTG          |
|                  |          | 6157 | CCGCAAGCTTGTGCGACTACACATCTCTCATGCTG          |
|                  | CPK33    | 5267 | GGCTGATATCGGATCCATGGGGAATTGCTTAGCCA          |
|                  |          | 6158 | CCGCAAGCTTGTGCGATTAGAACAATCTTGGTTGTTG        |
| Yeast two hybrid | FT       | 3371 | cccgggGATGTCTATAAATAAGAGACCCT                |
|                  |          | 3372 | gtcgacAAGTCTTCTTCCCTCCGCAGCC                 |
|                  | FD       | 678  | ggatccGTATGTTGTCATCAGCTAAGCATCAGA            |
|                  |          | 689  | gtcgacTCAAATGGAGCTGTGGAAGACCGTT              |
|                  | T282A    | 690  | cccgggGATGTTGTCATCAGCTAAGCATCAGA             |
|                  |          | 2245 | gtcgacAAATGGAGCTGCGGAAGACCGTTGAA             |
|                  | T282E    | 690  | cccgggGATGTTGTCATCAGCTAAGCATCAGA             |
|                  |          | 2246 | gtcgacAAATGGAGCTTCGGAAGACCGTTGAA             |
|                  | L277Q    | 690  | ggatccGTATGTTGTCATCAGCTAAGCATCAGA            |
|                  |          | 4295 | gtcgacTCAAATGGAGCTGTGGAAGACCGTTGTTGTGTGTTCTT |
|                  | LQTE     | 690  | ggatccGTATGTTGTCATCAGCTAAGCATCAGA            |

|                      |          |       |                                                                                                                                                        |
|----------------------|----------|-------|--------------------------------------------------------------------------------------------------------------------------------------------------------|
|                      |          | 4296  | gtcgacTCAAAATGGAGCTTCGGAAGACCGTTGTTGTGTGTTCTT                                                                                                          |
|                      | GRF3 Psi | 4263  | ggatccatATGTCGACAAGGGAAGAGAAT                                                                                                                          |
|                      |          | 4264  | ctgcagCTCGGCACCATCGGGCTTTGAT                                                                                                                           |
|                      | GRF4 Phi | 4265  | ccgggtATGGCGGCACCACCAGCATCAT                                                                                                                           |
|                      |          | 4011  | ggatccGATCTCCTTCTGTTCTTCAGCAGGCT                                                                                                                       |
| Plant transformation | YN-T282E | 1483  | tctagaATGGTGAGCAAGGGCGAGGA                                                                                                                             |
|                      |          | T282E | gagctcTCAAAATGGAGCTTCGGAAGACCGTTGAA                                                                                                                    |
|                      | FD       | 700   | aggatccATGTTGTCATCAGCTAAGCAT                                                                                                                           |
|                      |          | 695   | ccgcggTCAAAATGGAGCTGTGGAAGA                                                                                                                            |
|                      | T282A    | 700   | aggatccATGTTGTCATCAGCTAAGCAT                                                                                                                           |
|                      |          | 4207  | ccgcggTCAAAATGGAGCTGCGGAAGACCGTTGAA                                                                                                                    |
|                      | T282E    | 700   | aggatccATGTTGTCATCAGCTAAGCAT                                                                                                                           |
|                      |          | 4206  | ccgcggTCAAAATGGAGCTTCGGAAGACCGTTGAA                                                                                                                    |
|                      | L277Q    | 700   | aggatccATGTTGTCATCAGCTAAGCAT                                                                                                                           |
|                      |          | 695   | ccgcggTCAAAATGGAGCTGTGGAAGA                                                                                                                            |
|                      | LQTE     | 700   | aggatccATGTTGTCATCAGCTAAGCAT                                                                                                                           |
|                      |          | 4206  | ccgcggTCAAAATGGAGCTTCGGAAGACCGTTGAA                                                                                                                    |
|                      | 3HA:His  | 4910  | GGGGGTTAATTAACATCTTTTACCCATACGATGTTCTGACTATGCGGGCTATCCCTATGACGTCCCGGACTATGCAG<br>GATCCTATCCATATGACGTTCCAGATTACGCTGCTCAGTGCAGCCACCACCACCACCACCAGGCTAGGC |
|                      |          | 4911  | CTAGTGGTGGTGGTGGTGGTGGCTGCACTGAGCAGCGTAATCTGGAACGTCATATGGATAGGATCCTGCATAGTCC                                                                           |

|         |      |  |                                                                      |
|---------|------|--|----------------------------------------------------------------------|
|         |      |  | GGGACGTCATAGGGATAGCCCGCATAGTCAGGAACATCGTATGGGTAAAAGATGTTAATTAACCCCGC |
| EYFP    | 5140 |  | ggatccccgggtaccgagctcATGGTGAGCAAGGGCGAGGA                            |
|         | 5141 |  | aaccaccggtggCTTGTACAGCTCGTCCATGC                                     |
| FD      | 700  |  | aggatccATGTTGTCATCAGCTAAGCAT                                         |
|         | 1475 |  | aaccgggAAATGGAGCTGTGGAAGACCGT                                        |
| mCherry | 3467 |  | tccccggtATGGTGAGCAAGGGCGAGGAGGATAAC                                  |
|         | 3468 |  | tccccggtTACTTGTACAGCTCGTCCATGCCGCC                                   |
| CPK1    | 5203 |  | CACGGGGACTCTAGATGGGTAATACTTGTGTTGG                                   |
|         | 5204 |  | ATGAGCTCGGTACCCGAGTTTAAGAGCAATGCTAAA                                 |
| CPK3    | 5207 |  | CACGGGGACTCTAGATGGGCCACAGACACAGC                                     |
|         | 5208 |  | ATGAGCTCGGTACCCATTCTGCGTCGGTTTGG                                     |
| CPK4    | 5209 |  | CACGGGGACTCTAGATGGAGAAACCAAACCTAG                                    |
|         | 5210 |  | ATGAGCTCGGTACCCCTTTGGTGAATCATCAGATTT                                 |
| CPK5    | 5211 |  | CACGGGGACTCTAGATGGGCAATCTTGCCGTG                                     |
|         | 5212 |  | ATGAGCTCGGTACCCCGCTCTCTCATGCTAATG                                    |
| CPK6    | 5213 |  | CACGGGGACTCTAGATGGGCAATTCATGTCGTG                                    |
|         | 5214 |  | ATGAGCTCGGTACCCACATCTCTCATGCTGATG                                    |
| CPK7    | 5215 |  | CACGGGGACTCTAGATGGGGAATTGTTGTGGCA                                    |
|         | 5216 |  | ATGAGCTCGGTACCCGGTCTCGCCTTCTAATTGC                                   |
| CPK8    | 5217 |  | CACGGGGACTCTAGATGGGAAATTGTTGTGCGAG                                   |

|       |      |                                      |
|-------|------|--------------------------------------|
|       | 5218 | ATGAGCTCGGTACCCATTTTCGCCTTCTAATTGCAA |
| CPK9  | 5219 | CACGGGGGACTCTAGATGGGAAATTGTTTTGCCAAG |
|       | 5220 | ATGAGCTCGGTACCCGAACAGCCGAGGTTGTTG    |
| CPK10 | 5221 | CACGGGGGACTCTAGATGGGTAAGTGAACGCCT    |
|       | 5222 | ATGAGCTCGGTACCCAACAGGAACAGTTTGTCCAG  |
| CPK11 | 5223 | CACGGGGGACTCTAGATGGAGACGAAGCCAAACC   |
|       | 5224 | ATGAGCTCGGTACCCGTCATCAGATTTTTCACCATC |
| CPK12 | 5225 | CACGGGGGACTCTAGATGGCGAACAAACCAAGAAC  |
|       | 5226 | ATGAGCTCGGTACCCGACATTCATAGACTCATCAG  |
| CPK13 | 5227 | CACGGGGGACTCTAGATGGGAAACTGTTGCAGATC  |
|       | 5228 | ATGAGCTCGGTACCCTTCGTTGCCTAGGTTCAAAG  |
| CPK15 | 5231 | CACGGGGGACTCTAGATGGGTTGCTTTAGCAGCA   |
|       | 5232 | ATGAGCTCGGTACCCTTGACTGGAAGAATTTTCC   |
| CPK21 | 5243 | CACGGGGGACTCTAGATGGGTTGCTTCAGCAGTA   |
|       | 5244 | ATGAGCTCGGTACCCATGGAATGGAAGCAGTTTCC  |
| CPK23 | 5245 | CACGGGGGACTCTAGATGGGTTGTTTCAGCAGTAA  |
|       | 5246 | ATGAGCTCGGTACCCGTGGAATGGATACTGTTTCC  |
| CPK26 | 5253 | CACGGGGGACTCTAGATGCATAGAGATCTAAAGCC  |
|       | 5254 | ATGAGCTCGGTACCCTGCGAGACGGCATTGTT     |
| CPK27 | 5255 | CACGGGGGACTCTAGATGGGTTGCTTCAGCAGTA   |



|        |        |      |                                       |
|--------|--------|------|---------------------------------------|
|        |        | 5256 | ATGAGCTCGGTACCCATTGATGATCGGAAGAAGTTC  |
|        | CPK28  | 5257 | CACGGGGGACTCTAGATGGGTGTCTGTTTCTCCG    |
|        |        | 5258 | ATGAGCTCGGTACCCCTCGAAGATTCCTGTGACCT   |
|        | CPK30  | 5261 | CACGGGGGACTCTAGATGGGTAATTGTATCGCCTG   |
|        |        | 5262 | ATGAGCTCGGTACCCAACTGCAATAGATTGTCCAG   |
|        | CPK31  | 5263 | CACGGGGGACTCTAGATGGGTTGCTACAGCAGTA    |
|        |        | 5264 | ATGAGCTCGGTACCCCTTGATCGGAAGAAGCTCC    |
|        | CPK32  | 5265 | CACGGGGGACTCTAGATGGGTAATTGTTGCGGAAC   |
|        |        | 5266 | ATGAGCTCGGTACCCCTCTTGATCACCATTGACCT   |
|        | CPK33  | 5267 | CACGGGGGACTCTAGATGGGGAATTGCTTAGCCA    |
|        |        | 5268 | ATGAGCTCGGTACCCGAACAATCTTGGTTGTTGTG   |
|        | pCPK6  | 6324 | GGCCAGTGCCAAGCTTACATAAGTTGTTAAGGAGTTT |
|        |        | 6325 | GAATTGCCCATCTAGGAAACAACTCTCTATTTT     |
|        | pCPK33 | 6322 | GGCCAGTGCCAAGCTGCGTTTCTTGAGAGGCAAG    |
|        |        | 6323 | CAATCCCATCTAGTGCCCGTTCGTCTTTGCT       |
| RT-PCR | AP1    | 486  | GCACATCCGCACTAGAAAAA                  |
|        |        | 487  | CTTCTTGATACAGACCACCA                  |
|        | FD     | 1527 | TAATCTTCATACCCACCATCAC                |
|        |        | 1528 | CAATCCCCAAAAGAGAAACAAG                |
|        | LFY    | 1688 | ACGCCGTCATTTGCTACTCT                  |

|               |  |      |                                    |
|---------------|--|------|------------------------------------|
|               |  | 1689 | CTTTCTCCGTCTCTGCTGCT               |
| ACT2          |  | 2151 | AGAGATTCAGATGCCCAGAAGTCTTGTTCC     |
|               |  | 2152 | AACGATTCTGGACCTGCCTCATCATACTC      |
| CPK4 3' part  |  | 2717 | TTATGGATGCGGCGGATATAGACA           |
|               |  | 2718 | GAGTTCTCATTCTCAATTCCAAGT           |
| CPK4 5' part  |  | 6116 | GAGAAACCAAACCCTAGAAGACC            |
|               |  | 6117 | CAGGTGCAACATAATACGGAC              |
| CPK6 3' part  |  | 6023 | TAGATCAAGACAACGATGGACGGAT          |
|               |  | 6024 | TGTTACAAACAAACAAAACAGAGAG          |
| CPK6 5' part  |  | 6118 | ATTACCCAACCAGAAACAGCAACA           |
|               |  | 6119 | TACGCCGCATAATGGGTTCTTT             |
| CPK33 3' part |  | 6031 | AAGATGGGAGTGGATACATTACGACA         |
|               |  | 6032 | TGTTATCTTCCTCTGTTATATACTT          |
| CPK33 5' part |  | 6120 | AGGCCAGTTTGAGTAACGTAT              |
|               |  | 6121 | ATACACTCTCCCTTCTTCGATAA            |
| CPK4 CDS      |  | 6116 | GAGAAACCAAACCCTAGAAGACC            |
|               |  | 2718 | GAGTTCTCATTCTCAATTCCAAGT           |
| CPK6 CDS      |  | 2467 | ATGGGCAATTCATGTCGTGG               |
|               |  | 2468 | CTACACATCTCTCATGCTGA               |
| CPK33 CDS     |  | 6322 | GGCCAGTGCCAAGCTGCGTTTCTTGAGAGGCAAG |

|         |       |      |                                  |
|---------|-------|------|----------------------------------|
|         |       | 6323 | CAATCCCCATCTAGTGCCCGTTCGTCTTTGCT |
| qRT-PCR | CPK6  | 1784 | AGACAACGATGGACGGATTG             |
|         |       | 1785 | CTCCCTACACCAGCATTTC              |
|         | CPK33 | 1782 | CGCTGATAATGACGGTAGAATC           |
|         |       | 1783 | TTCCCACTTCTCATCATAGCAC           |
|         | FLC   | 2816 | CCGAACTCATGTTGAAGCTTGTTGAG       |
|         |       | 2817 | CGGAGATTTGTCCAGCAGGTG            |
|         | TUB   | 1230 | CAAGCTTTCGGAGGTCAGAG             |
|         |       | 1891 | CAGCTTTGGTGATTTGAAC              |

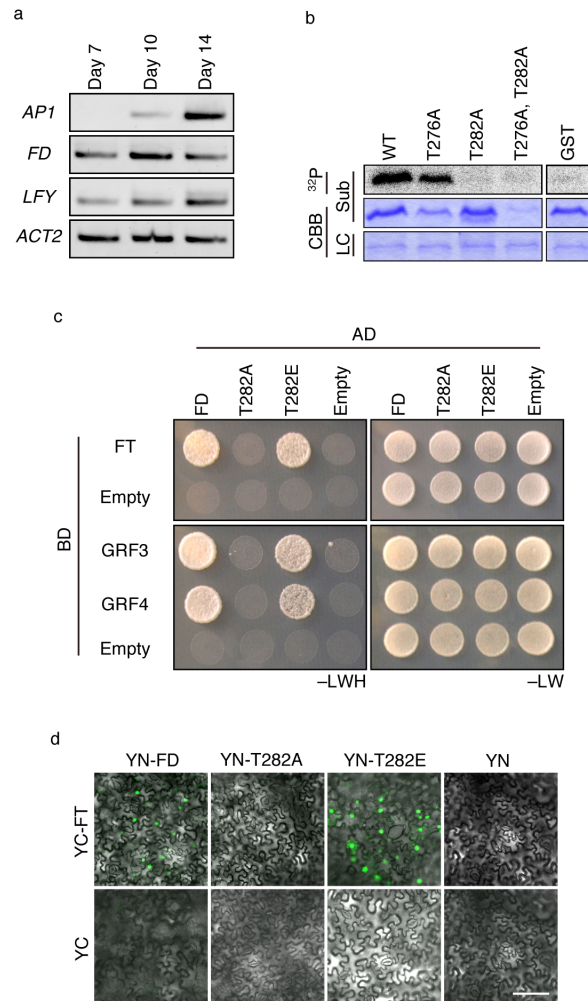

### **Supplementary Fig. S1. Phosphorylation of FD T282 and protein interaction**

(a) Expression of *FD*, *API*, and *LEAFY (LFY)* in the plant samples used for kinase assays. Plants were grown under LD conditions and shoot apices were collected at Zeitgeber time 15 on Day 7, 10, and 14. *ACTIN 2 (ACT2)* was used as a reference. RT-PCR conditions are described in *Supplementary Information*. (b) *In vitro* phosphorylation assay of FD T282. Wild-type (WT) and mutant versions of C4 peptide fused to GST or GST were used as a substrate. Protein extracts from shoot apices of 7-day-old plants were used as a kinases source. <sup>32</sup>P and CBB panels show autoradiography and Coomassie Brilliant Blue (CBB) staining images, respectively, of parts of the gel. Substrate (Sub) and loading control (LC, showing a band around the molecular mass of RubisCO large subunit) panels confirm that similar amounts of substrates and protein extracts, respectively, were used in the experiments. (c) Effect of substitution of FD T282 on interaction with FT and 14-3-3s. A non-phosphorylatable (T282A) version and a phospho-mimic (T282E) version of FD were tested for interaction with FT and two isoforms of 14-3-3, GRF3 (14-3-3 psi) and GRF4 (14-3-3 phi). -LWH and -LW indicate selective (SCD -Leu, -Trp, -His) and non-selective (SCD -Leu, -Trp) medium, respectively. (d) Effect of substitution of FD T282 on interaction with FT *in planta* examined by bi-molecular fluorescent complementation assay in *Nicotiana benthamiana* epidermal cells. N-terminal half of YFP (YN) fused to wild-type and mutant versions of FD (YN-FD, YN-T282A, and YN-T282E), YN, C-terminal half of YFP (YC) fused to FT (YC-FT), and YC were introduced into

epidermal cells in the indicated combinations. All images are in the same magnification.

Scale bar: 100  $\mu\text{m}$ .

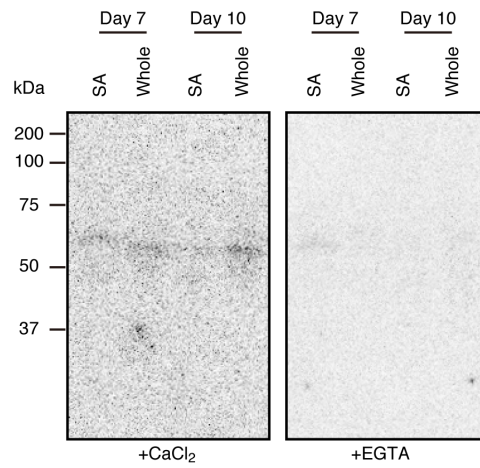

**Supplementary Fig. S2. In-gel kinase assay without substrates.**

Extracts from shoot apices (SA) or whole aerial parts (Whole) of plants of indicated ages were analyzed. Kinase reactions were performed in the presence (+CaCl<sub>2</sub>) or absence (+EGTA) of Ca<sup>2+</sup>.

a

|             |       | Leucine zipper |            |            | Phosphorylation motif |              |  |
|-------------|-------|----------------|------------|------------|-----------------------|--------------|--|
| Arabidopsis | FD    | QAYTNELELE     | VAHLQAENAR | LKRQQDQLKM | AAAIQQP-KK            | NTLQRSSTAPF  |  |
| Arabidopsis | FDP   | QAYTNELELE     | IAHLQTENAR | LKIQQEQLKI | AEATQNQ-VK            | KTQRSSTAPF   |  |
| Tomato      | SPGB  | QAYMNELESE     | VAHLVEENAR | LKKQQQLRV  | DAANQVP-KK            | NTLYRTSTAPF  |  |
| Kiwifruit   | AcFD  | QAYTNELELE     | VAHLMEENAR | LRSQQQLYL  | AAASQVP-RK            | KTLYRTSTAPF  |  |
| Rice        | OsFD1 | QARVNNLETE     | VEQLQENKM  | LRVKYEQLRK | TVEVPVP-VR            | RTLQRVLSAPF  |  |
| Maize       | DLF1  | QAYVRELETK     | VQLLQQENES | LRVKYDELRE | SVEVAVPMVR            | KTLMRMPSTAPF |  |
| Wheat       | FLD2  | QAYTNELENK     | VSRLVEENER | LKKQKELDMM | ITSAPPPEPK            | YQLRRTSSAPV  |  |

C4 domain

b

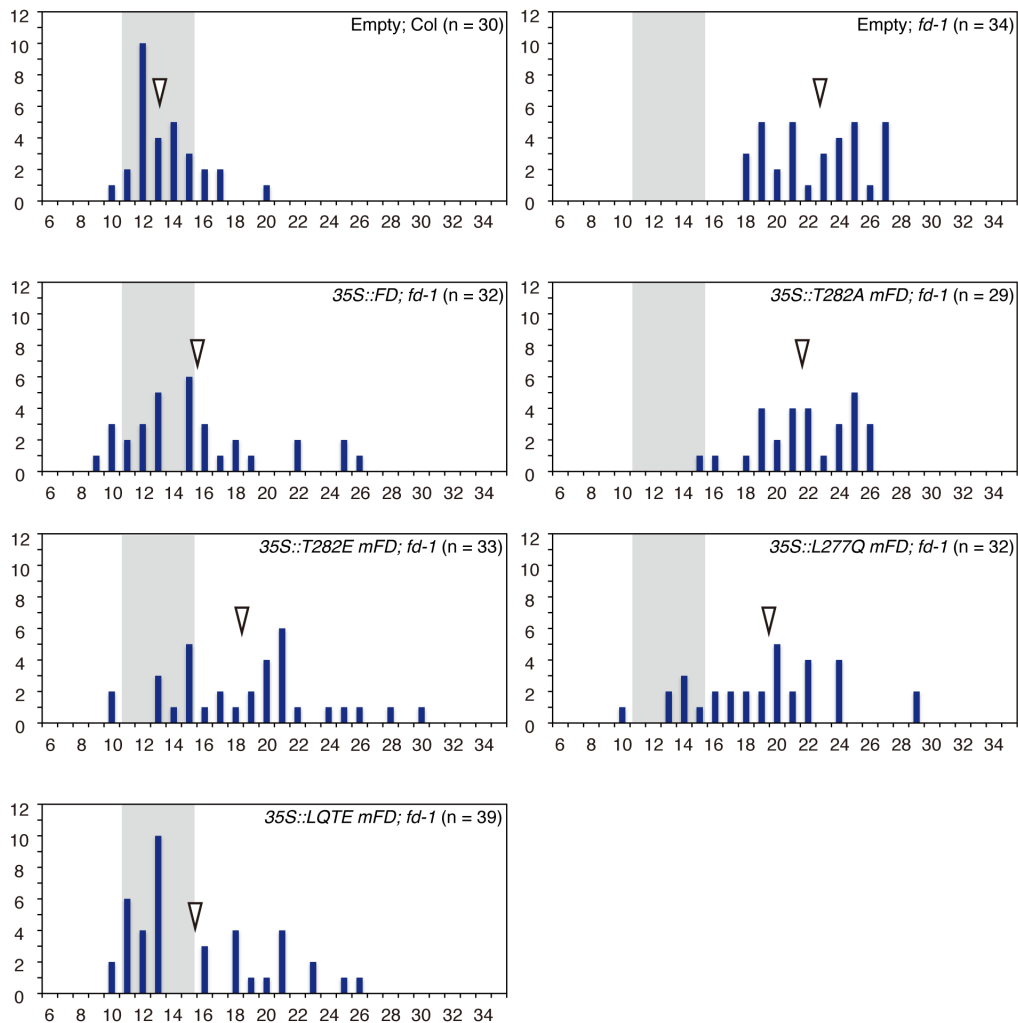



**Supplementary Fig. S3. Effect of sequence alterations in the C4 domain on FD activity**

(a) Sequence alignment of the C-terminal region of FD and its orthologous proteins. A crucial leucine residue for phosphorylation is highlighted by blue. Red box indicates a previously proposed core consensus sequence (R/K-X-X-S/T) for phosphorylation by CDPK/SnRK protein kinase family. Leucine residues in the leucine zipper are highlighted by pale green. (b) Effect of sequence alterations in the C4 domain on FD activity to complement *fd-1*. Wild-type and mutant versions of FD (T282A mFD, T282E mFD, L277Q mFD, and LQTE mFD) under the control of CaMV 35S RNA (35S) promoter were introduced into *fd-1*. Wild-type Col and *fd-1* plants with an empty vector were used as control transgenic plants. Distribution of flowering time (measured by the number of rosette leaves, horizontal axis) in T1 plants under LD conditions is shown for each transgenic genotype. Vertical axis represents the number of plants. Shaded area in each graph indicates the range of rosette leaf number of Empty; Col transgenic plants (average  $\pm$  1 standard deviation). Vertical open arrowheads indicate the average of rosette leaf number for each genotype.

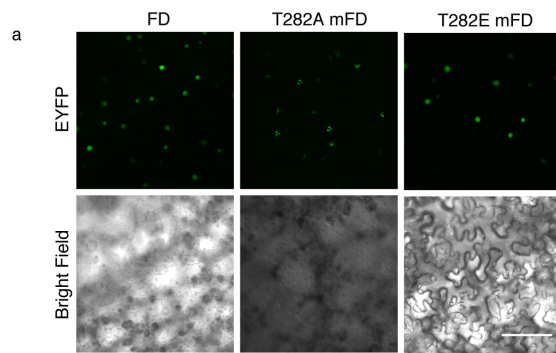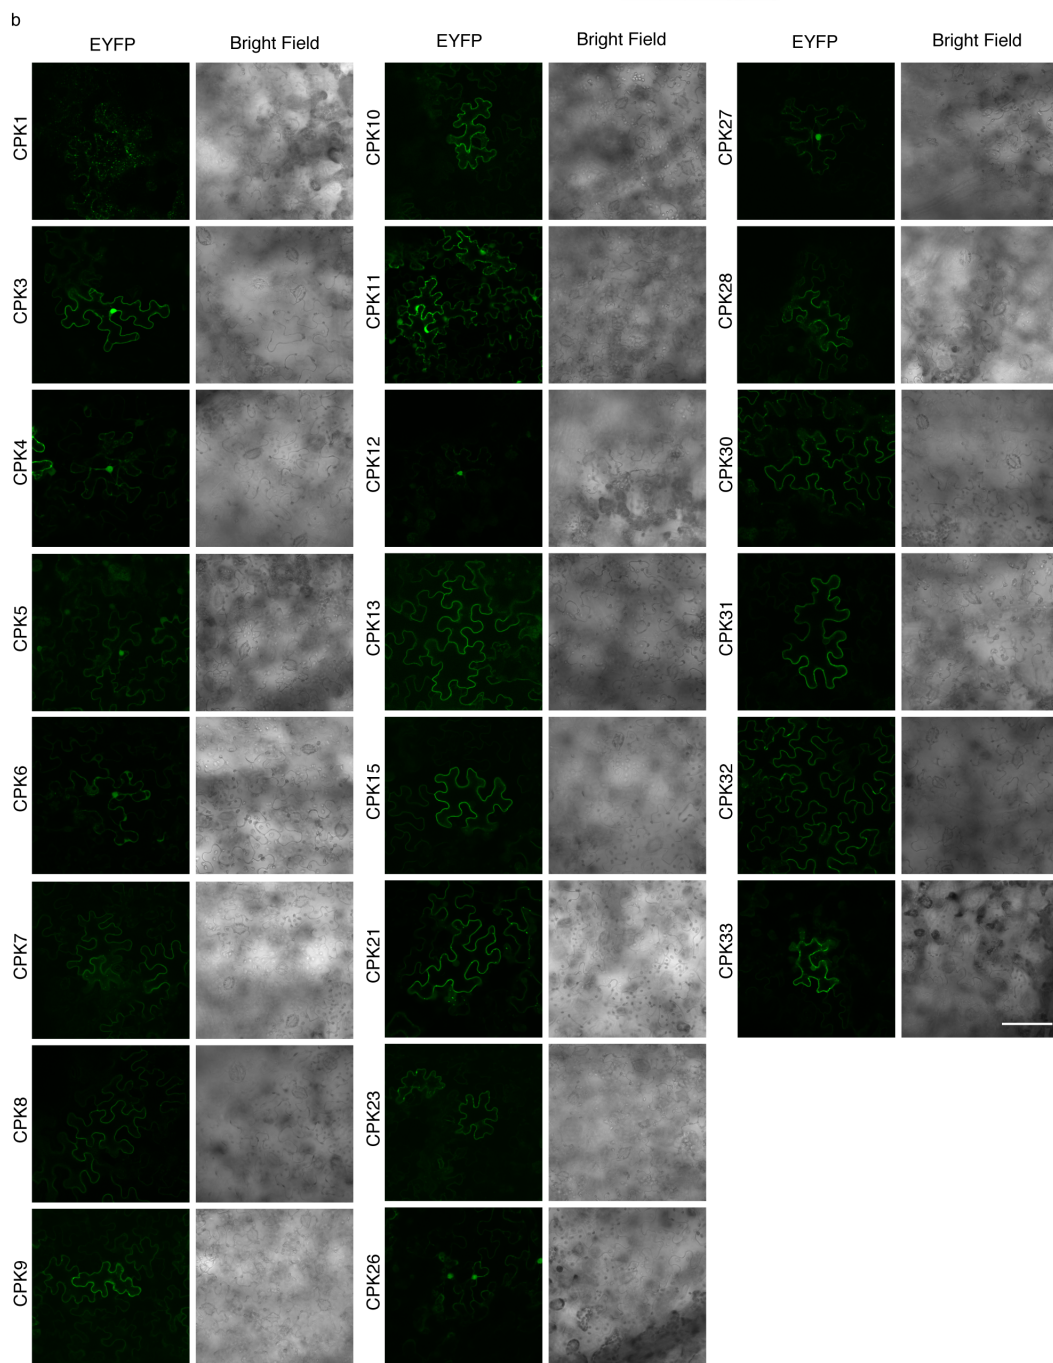

**Supplementary Fig. S4. Subcellular localization of FD and CDPKs.**

(a) Subcellular localization of wild-type and C4 domain mutant versions of FD transiently expressed in *Nicotiana benthamiana* leaf epidermal cells. (b) Subcellular localization of CDPK transiently expressed in *N. benthamiana* leaf epidermal cells. All the CPK proteins were expressed as a fusion with EYFP. EYFP fluorescence and bright-field images are shown. All images are in the same magnification. Scale bar: 100  $\mu\text{m}$ .

a

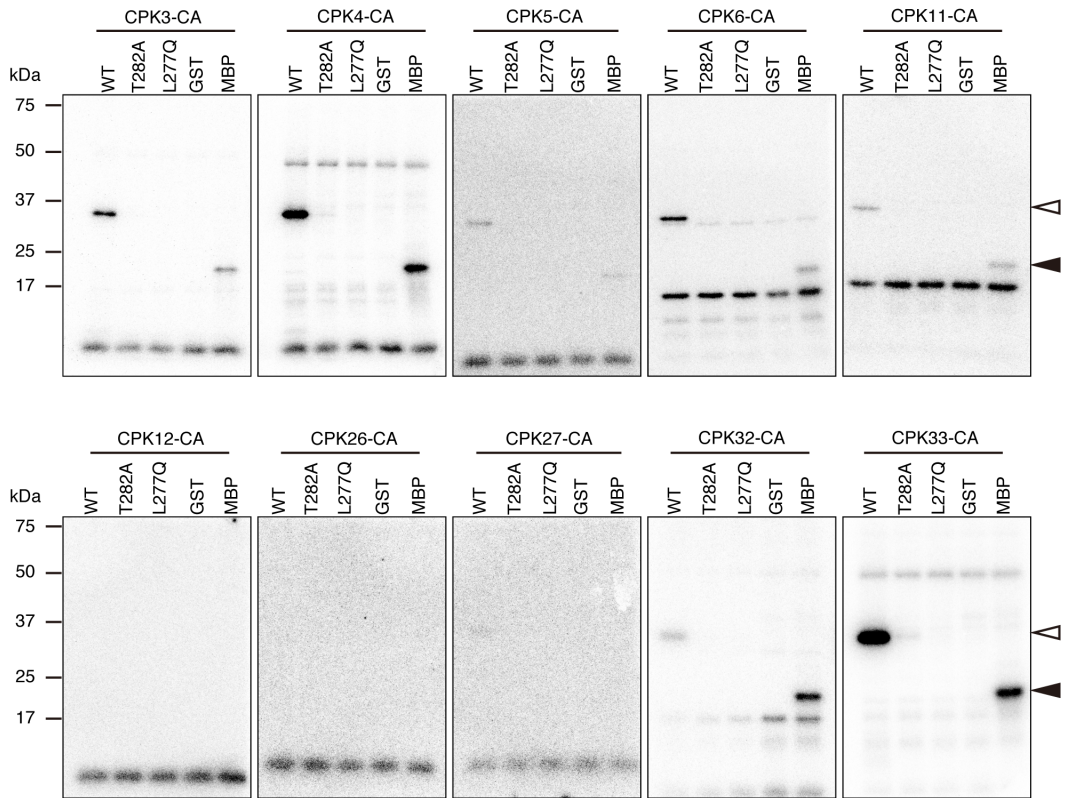

b

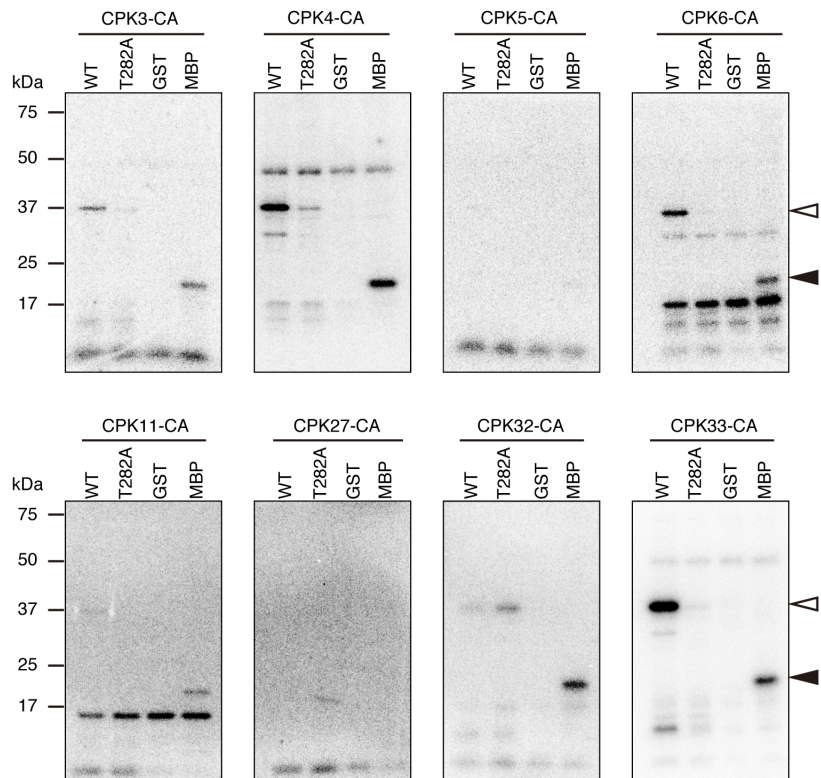

**Supplementary Fig. S5. *In vitro* phosphorylation of FD T282 by CPK-CAs.**

(a) Wild-type and mutant versions of C4 peptide fused to GST were used as substrates.

White and black arrowheads indicate phosphorylation signals from GST-tagged C4 peptide and MBP, respectively. Panels for CPK4-CA, CPK6-CA, and CPK33-CA are

uncropped images of the autoradiograms shown in Fig. 4b. (b) tFD and its mutant

derivatives fused to GST were used as substrates. White and black arrowheads indicate

phosphorylation signals from GST-tagged tFD and MBP, respectively. In both

experiments, GST and MBP were used as controls. CPK-CAs were constructed based

on published information<sup>38</sup> and primers used for cloning are shown in Table S2.

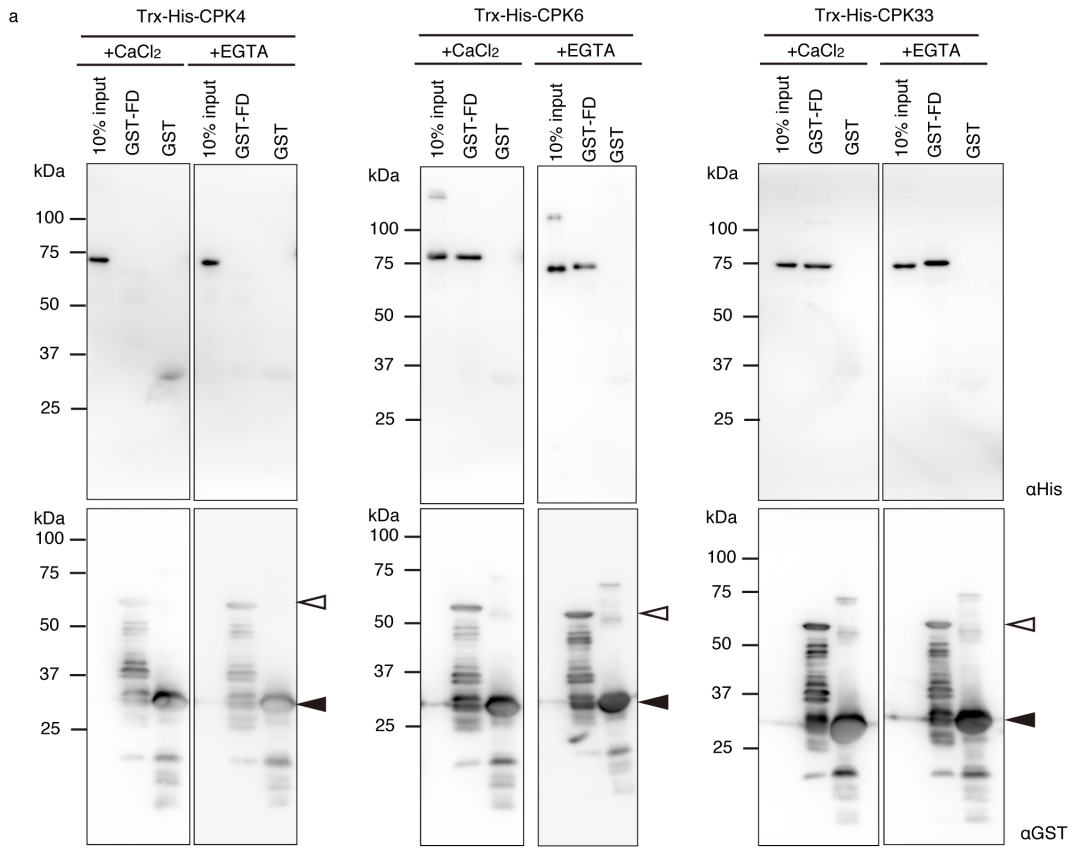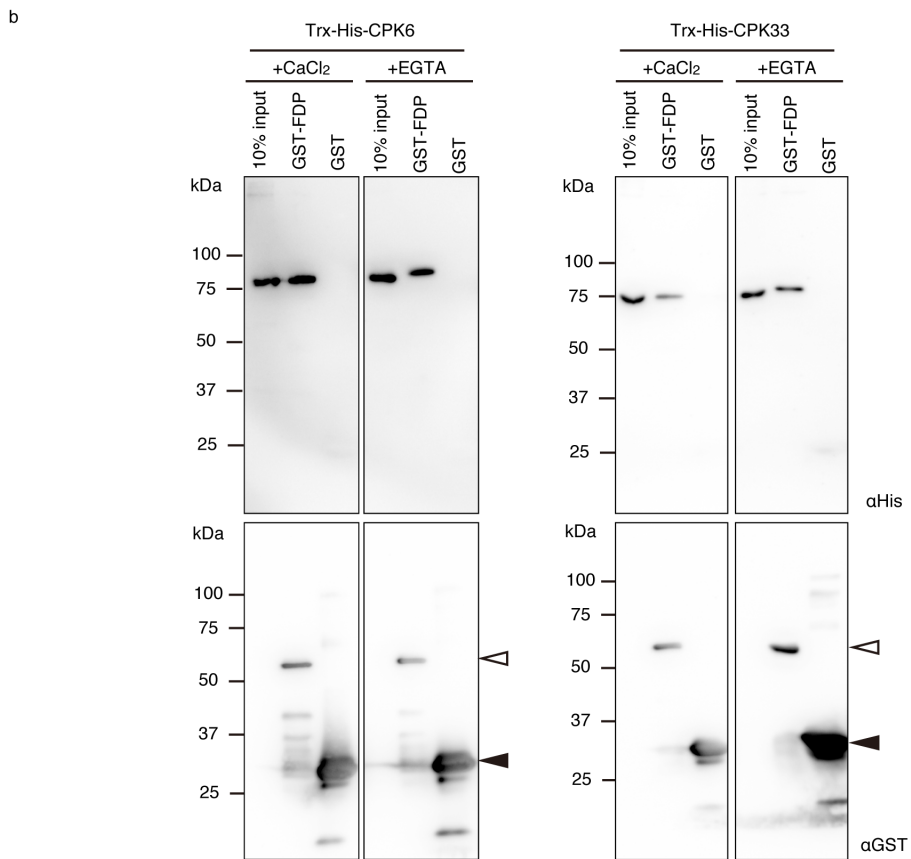

**Supplementary Fig. S6. Interaction of FD and FDP with CPK6 and CPK33 *in vitro***

(a) Uncropped images of the immunoblots shown in Fig. 4c (with anti-His tag antibody,  $\alpha$ His) and immunoblots with anti-GST antibody ( $\alpha$ GST). One-tenth volumes of the reactions were loaded in “10 % input” lanes. Black and white arrowheads indicate positions of GST-FD and GST, respectively. (b) Uncropped images of the immunoblots shown in Fig. 4d (with anti-His tag antibody,  $\alpha$ His) and immunoblots with anti-GST antibody ( $\alpha$ GST). Trx-His-CPKs were pulled-down with either GST-FDP or GST in the presence (+CaCl<sub>2</sub>) or absence (+EGTA) of Ca<sup>2+</sup>. One-tenth volumes of the reactions were loaded in “10 % input” lanes. Black and white arrowheads indicate positions of GST-FDP and GST, respectively.

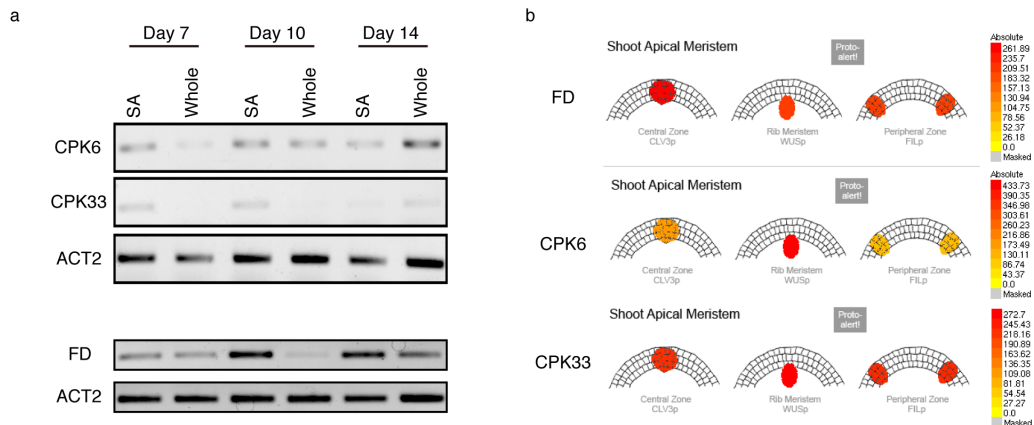

**Supplementary Fig. S7. Expression profiles of *FD*, *CPK6*, and *CPK33*.**

(a) RT-PCR analysis of *FD*, *CPK6*, and *CPK33* expression in shoot apices (SA) and whole aerial parts (Whole) from plants of the indicated ages grown in LD conditions.

RT-PCR conditions are described in *Supplementary Information*. *ACT2* was used as a reference. (b) Spatial expression pattern of *FD*, *CPK6*, and *CPK33* in shoot apex.

Images were retrieved from an Arabidopsis eFP browser

(<http://bar.utoronto.ca/efp/cgi-bin/efpWeb.cgi>).



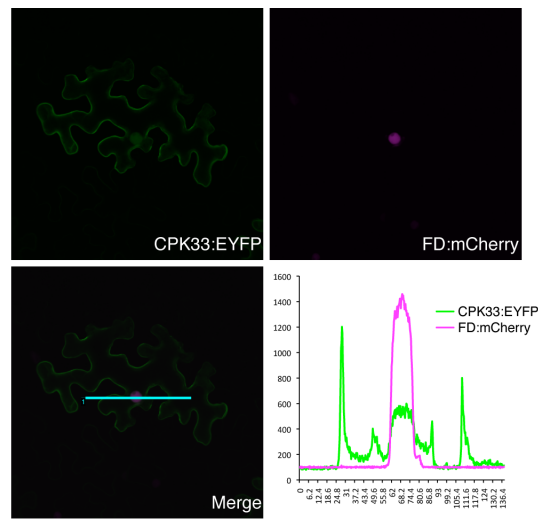

**Supplementary Fig. S8. Co-localization of CPK33 and FD proteins in the nucleus.**

CPK33 and FD proteins were co-expressed in *N. benthamiana* leaf epidermal cells as a fusion protein with either EYFP (CPK33) or mCherry (FD). Fluorescence images were obtained by confocal laser scanning microscopy. Fluorescence intensity along the indicated line (from left to right) on the merged image was quantified by ASW-10 software (Olympus). Vertical axis and horizontal axis in the graph indicate fluorescence intensity and the position on line (distance ( $\mu\text{m}$ ) from the left end), respectively.

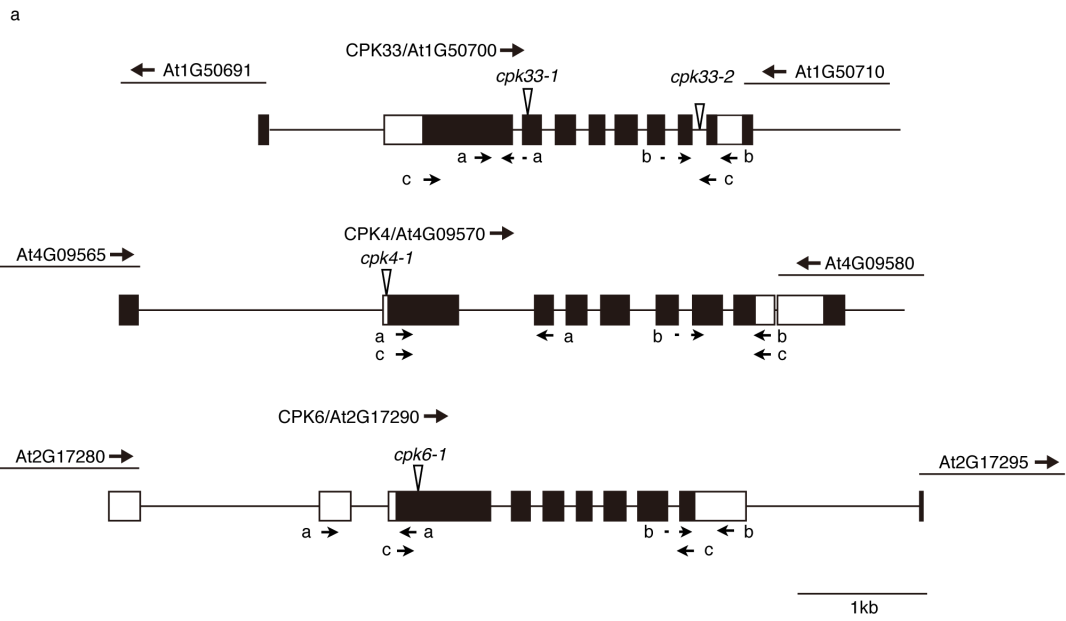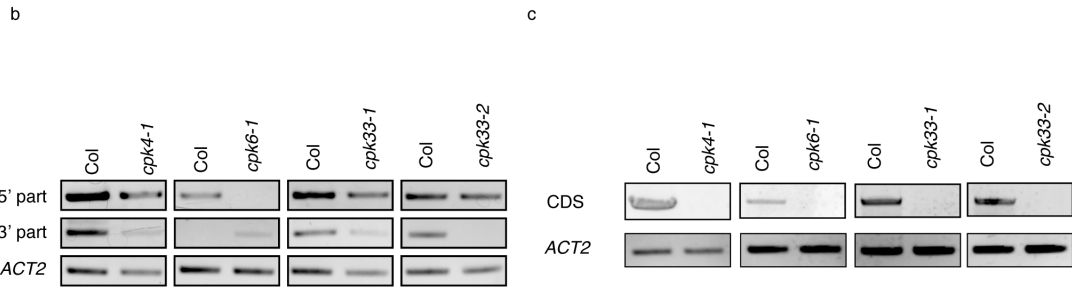

**Supplementary Fig. S9. *cpk4*, *cpk6*, and *cpk33* T-DNA insertion mutants.**

(a) Genomic regions of *CPK4*, *CPK6*, and *CPK33*. White and Black boxes indicate untranslated regions and coding regions, respectively. Inverted triangles indicate the positions of a T-DNA insertion. Small solid and broken arrows indicate primer positions used for RT-PCR analysis. For each gene, primers were designed to amplify 5' and 3' parts (a and b, respectively) and the entire coding region (c) of the transcript.

T-DNA is inserted in the coding region of kinase domain in *cpk6-1* and *cpk33-1*. (b), (c)

Analysis of CPK transcripts in the T-DNA insertion mutants by RT-PCR. The 5' and 3' parts (b) and the entire coding region (c) were amplified. RT-PCR conditions are described in *Supplementary Information*. Primer sequences are shown in Table S2.

*ACT2* was used as a reference.

a

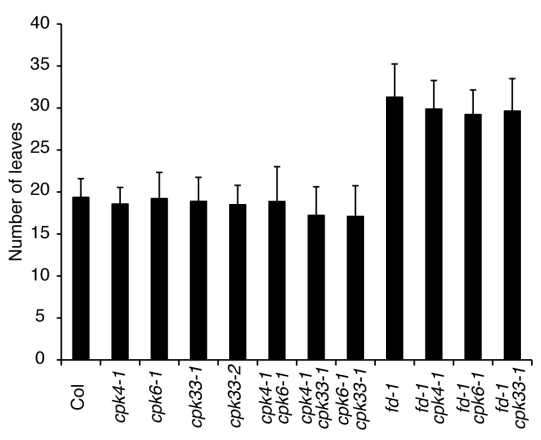

b

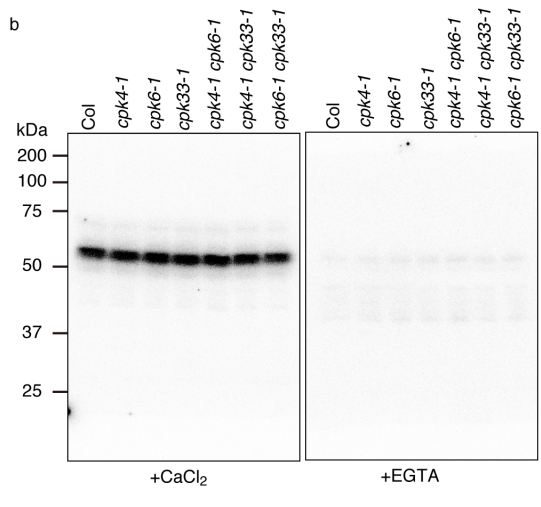

c

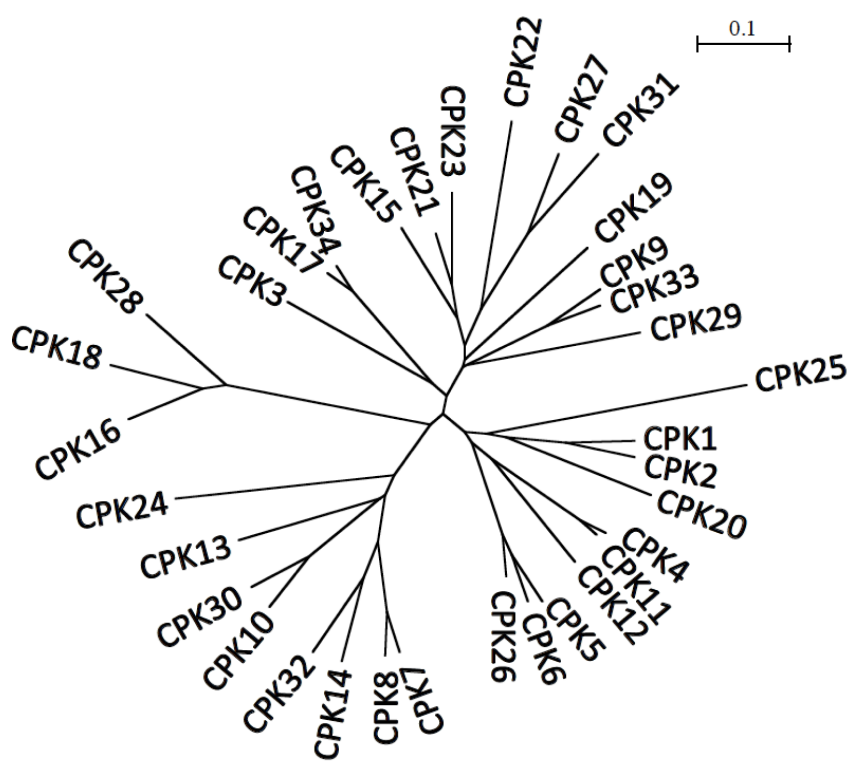

**Supplementary Fig. S10. Effects of *cpk* mutations on flowering and FD phosphorylation.**

(a) Flowering time of *cpk* single and double mutants and *cpk fd* double mutants in LD conditions. The number of leaves at flowering (mean  $\pm$  SD) is shown ( $n = 16$  for *fd-1 cpk33-1*,  $n = 21-24$  for other genotypes). (b) Phosphorylation of FD T282 by the in-gel kinase assay with protein extracts from shoot apices of *cpk* single and double mutants as a kinase source. (c) A unrooted phylogenetic tree of CDPK proteins in Arabidopsis.

a

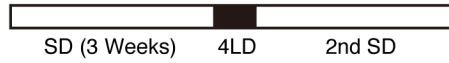

b

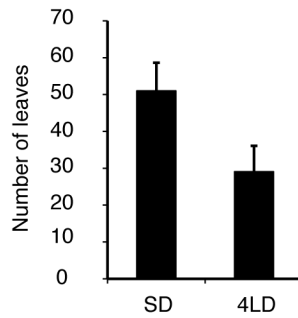

**Supplementary Fig. S11. Four LDs inserted into SD induces flowering.**

(a) Growth regime for SD/4LD/SD condition. Plants were grown under SD condition for 3 weeks, subjected to 4 days of LD condition, and then transferred back to the SD condition. (b) Wild-type plants (Col) were grown under SD condition (SD,  $n = 19$ ) and SD/4LD/SD condition (4LD,  $n = 16$ ), respectively. The number of rosette and cauline leaves was counted after flowering (mean  $\pm$  SD). There is a statistically significant difference ( $P < 0.001$ , Student's  $t$ -test [two-tailed test]).
